# Supplementary material
Source: PubMed Central journal article supplement (PMC3627505)
Supplement: DS_10.1177_0022034513481976.pdf [file DS_10.1177_0022034513481976.pdf]

Z. Zeng<sup>1,3</sup>, J.R. Shaffer<sup>1\*</sup>, X. Wang<sup>2</sup>,  
E. Feingold<sup>1,3</sup>, D.E. Weeks<sup>1,3</sup>, M. Lee<sup>2</sup>,  
K.T. Cuenco<sup>1,2</sup>, S.K. Wendell<sup>2</sup>, R.J. Weyant<sup>4</sup>,  
R. Crout<sup>5</sup>, D.W. McNeil<sup>6</sup>, and M.L. Marazita<sup>1,2,7\*</sup>

<sup>1</sup>Department of Human Genetics, Graduate School of Public Health, University of Pittsburgh, Pittsburgh, PA, USA; <sup>2</sup>Center for Craniofacial & Dental Genetics, Department of Oral Biology, School of Dental Medicine, University of Pittsburgh, Pittsburgh, PA, USA; <sup>3</sup>Department of Biostatistics, Graduate School of Public Health, University of Pittsburgh, Pittsburgh, PA, USA; <sup>4</sup>Department of Dental Public Health and Information Management, School of Dental Medicine, University of Pittsburgh, Pittsburgh, PA, USA; <sup>5</sup>Department of Periodontics, School of Dentistry, West Virginia University, Morgantown, WV, USA; <sup>6</sup>Dental Practice and Rural Health, West Virginia University, Morgantown, WV, USA; and <sup>7</sup>Clinical and Translational Science, School of Medicine, University of Pittsburgh, Pittsburgh, PA, USA; \*corresponding authors, marazita@pitt.edu, jrs51@pitt.edu

*J Dent Res* DOI: 10.1177/0022034513481976

## APPENDIX

### MATERIALS & METHODS

#### Samples

Study participants were identified as part of a program by the Center for Oral Health Research in Appalachia (COHRA), a partnership between the University of Pittsburgh and West Virginia University, which has been described previously (Polk *et al.*, 2008). All residents of an eligible household having at least one biological parent-child pair were invited to participate without regard to oral health status or other biological and/or legal relationships. Written informed consent was provided by all adult participants, and assent with parent or guardian written consent was provided by all child participants. All forms and protocols were approved by the COHRA research committee and Institutional Review Boards of the University of Pittsburgh and West Virginia University (all participants provided assent with written parental informed consent, and all study procedures were approved by Institutional Review Boards at the pertinent universities). To maintain statistical power, we did not exclude related samples. In total, 1,063 self-reported whites had dental caries assessments and data on all covariates for the PF-surface analysis, while 1,049 had caries and covariate data for the SM-surface analysis. Among them, 1,017 individuals had genotype data and were included in the PF-surface scan, while 1,004 were included in the SM-surface scan. Imputation of autosomal SNPs was done only for individuals who were of genetically determined European ancestry as defined by principal component analysis (996 individuals in the PF-surface scan, and 982 individuals in the SM-surface scan).

# Genome-wide Association Studies of Pit-and-Fissure- and Smooth-surface Caries in Permanent Dentition

#### Phenotypes

Dentists, or research dental hygienists who were annually calibrated to a reference dentist, assessed dental caries in participants by intra-oral examination as previously described in detail (Wang *et al.*, 2010). All surfaces of all permanent teeth were individually scored, based on visual inspection, as sound (*i.e.*, no evidence of decay), pre-cavitated, decayed (according to a four-level classification of lesion progression), filled, missing due to decay, hypoplastic, or missing due to causes other than decay. Inter- and intra-examiner concordance was high (Wendell *et al.*, 2010).

#### Covariate Selection and Description

Eight variables in our dataset were considered as potential covariates in construction of the models for the genetic association tests: age at examination, sex, education group, saliva flow, source of water (*i.e.*, city/public, well, and other), home water fluoride level, toothbrushing frequency, and the presence of *Streptococcus mutans*. We applied a forward step-wise selection strategy to determine the covariate(s) in the linear regression models for PF- and SM-surface analyses, respectively. First, age was forced to be in the initial models, since its effect had been established previously. Each of the other covariates as well as age<sup>2</sup> was added to the model and tested individually. The most significant covariate (with the smallest partial F-test *p* value) was retained in the model. Then, the procedure was repeated until no incoming covariate was significant (partial F-test *p* value < .05). In the final models, age, sex, and the presence of *Streptococcus mutans* were included for PF D1MFS, and age, education group, and the presence of *Streptococcus mutans* were

**Appendix Table 1.** 66 SNPs for PF Surface Scans Meeting Suggestive Significance (*i.e.*,  $p$  value < 5E-5)

| CHR | BP        | SNP        | A1 | A2 | A1_freq | Beta    | $p$      | Imputed |
|-----|-----------|------------|----|----|---------|---------|----------|---------|
| 1   | 75533665  | rs10493567 | C  | T  | 0.9505  | -2.4614 | 3.61E-05 | Yes     |
| 2   | 205437485 | rs12328369 | A  | T  | 0.0203  | 4.3552  | 1.75E-05 | Yes     |
| 2   | 205437540 | rs12327977 | C  | T  | 0.9833  | -4.3196 | 2.36E-05 | Yes     |
| 3   | 59976454  | rs17061812 | A  | G  | 0.0463  | 2.9681  | 7.18E-06 | Yes     |
| 3   | 59976865  | rs9311745  | C  | T  | 0.0466  | 2.9914  | 5.02E-06 | Yes     |
| 3   | 62666659  | rs13068742 | A  | T  | 0.1053  | -1.7671 | 4.00E-05 | Yes     |
| 3   | 72389275  | rs10212587 | A  | T  | 0.7369  | -1.2793 | 4.17E-05 | Yes     |
| 3   | 72393455  | rs6549449  | C  | T  | 0.739   | -1.2861 | 3.42E-05 | Yes     |
| 3   | 129687641 | rs2335052  | A  | G  | 0.1474  | 1.501   | 4.14E-05 | No      |
| 3   | 129723644 | rs7433900  | A  | G  | 0.1994  | 1.443   | 1.07E-05 | No      |
| 3   | 129728399 | rs9819402  | A  | C  | 0.1704  | 1.4483  | 3.01E-05 | Yes     |
| 3   | 129734368 | rs4431128  | C  | T  | 0.8307  | -1.4839 | 1.73E-05 | Yes     |
| 3   | 129743240 | rs4857855  | T  | C  | 0.1698  | 1.431   | 3.04E-05 | No      |
| 3   | 129759438 | rs4857907  | A  | G  | 0.1832  | 1.5327  | 6.14E-06 | Yes     |
| 3   | 129761493 | rs2335050  | T  | C  | 0.1813  | 1.511   | 7.87E-06 | No      |
| 3   | 129765387 | rs6806253  | A  | G  | 0.8295  | -1.5595 | 5.67E-06 | Yes     |
| 3   | 129768184 | rs17344939 | T  | C  | 0.1522  | 1.58    | 1.22E-05 | No      |
| 3   | 129772898 | rs2713589  | A  | G  | 0.1465  | 1.595   | 1.58E-05 | No      |
| 3   | 129774903 | rs2734046  | A  | G  | 0.1507  | 1.5674  | 1.59E-05 | Yes     |
| 5   | 5288028   | rs2913630  | T  | C  | 0.2295  | 1.289   | 2.91E-05 | No      |
| 6   | 511741    | rs2476842  | T  | C  | 0.4871  | 1.077   | 1.57E-05 | No      |
| 6   | 522820    | rs9504361  | G  | A  | 0.4504  | 1.156   | 5.77E-06 | No      |
| 6   | 39338549  | rs4711589  | C  | A  | 0.323   | -1.157  | 1.82E-05 | No      |
| 6   | 39338991  | rs11961538 | C  | T  | 0.3511  | -1.1486 | 1.30E-05 | Yes     |
| 6   | 39354834  | rs2758873  | A  | G  | 0.3294  | -1.1184 | 3.24E-05 | Yes     |
| 6   | 39368775  | rs2815060  | A  | T  | 0.6714  | 1.1066  | 3.86E-05 | Yes     |
| 7   | 11479349  | rs2189310  | C  | T  | 0.2555  | 1.259   | 1.75E-05 | No      |
| 7   | 41776860  | rs10951660 | A  | G  | 0.3896  | 1.1296  | 1.46E-05 | Yes     |
| 7   | 41778433  | rs10486722 | C  | T  | 0.3349  | 1.215   | 6.50E-06 | No      |
| 7   | 137238909 | rs273969   | A  | G  | 0.2992  | 1.3448  | 3.02E-05 | Yes     |
| 8   | 22295813  | rs12545568 | G  | A  | 0.1827  | 1.438   | 1.09E-05 | No      |
| 8   | 22317574  | rs11987482 | G  | A  | 0.181   | 1.328   | 4.29E-05 | No      |
| 8   | 22319611  | rs7819400  | G  | A  | 0.1908  | 1.374   | 1.56E-05 | No      |
| 8   | 27576103  | rs492786   | T  | C  | 0.3807  | 1.053   | 4.83E-05 | No      |
| 8   | 27576664  | rs542876   | A  | G  | 0.3807  | 1.053   | 4.83E-05 | No      |
| 8   | 56645014  | rs13251620 | C  | T  | 0.7297  | 1.2421  | 3.85E-05 | Yes     |
| 8   | 56897479  | rs7829716  | A  | G  | 0.0262  | 3.4449  | 2.62E-05 | Yes     |
| 8   | 56928693  | rs10087354 | A  | G  | 0.9742  | -3.3874 | 4.05E-05 | Yes     |
| 8   | 90280216  | rs2046315  | T  | C  | 0.1322  | 1.871   | 6.50E-07 | No      |
| 8   | 127035340 | rs10956273 | A  | G  | 0.9348  | 2.1817  | 4.00E-05 | Yes     |
| 8   | 127037469 | rs10505464 | C  | A  | 0.06345 | -2.212  | 3.27E-05 | No      |
| 9   | 2170694   | rs10965113 | C  | T  | 0.1385  | 1.5509  | 4.38E-05 | Yes     |
| 9   | 17407517  | rs2593395  | A  | G  | 0.06903 | 2.137   | 1.83E-05 | No      |
| 9   | 27792678  | rs10114706 | C  | T  | 0.9687  | -3.0511 | 4.78E-05 | Yes     |
| 9   | 27800414  | rs4878586  | C  | T  | 0.9637  | -3.0614 | 4.95E-05 | Yes     |
| 9   | 70577584  | rs10511964 | A  | C  | 0.4717  | -1.0711 | 2.22E-05 | Yes     |
| 9   | 70580991  | rs12350270 | A  | G  | 0.4891  | 1.1532  | 1.03E-05 | Yes     |
| 9   | 70658077  | rs10869420 | A  | C  | 0.467   | 1.083   | 2.28E-05 | No      |
| 9   | 70661732  | rs6560397  | T  | C  | 0.4671  | -1.289  | 2.40E-07 | No      |
| 9   | 70703782  | rs4745375  | T  | G  | 0.2657  | -1.211  | 1.99E-05 | No      |
| 9   | 70704367  | rs883951   | A  | G  | 0.7277  | 1.2949  | 4.84E-06 | Yes     |
| 10  | 1502856   | rs6560737  | T  | C  | 0.2075  | -1.339  | 2.95E-05 | No      |
| 10  | 29330964  | rs11007352 | A  | C  | 0.9264  | 2.0409  | 2.10E-05 | Yes     |
| 12  | 55732112  | rs324021   | C  | A  | 0.4313  | 1.081   | 3.02E-05 | No      |
| 12  | 55736077  | rs1044931  | C  | T  | 0.5674  | -1.1019 | 2.34E-05 | Yes     |
| 13  | 58708493  | rs4884323  | G  | T  | 0.4012  | 1.14    | 1.41E-05 | No      |
| 13  | 58708732  | rs9570071  | A  | G  | 0.374   | 1.11    | 2.18E-05 | No      |
| 14  | 82206638  | rs1777696  | C  | T  | 0.489   | -1.041  | 4.68E-05 | No      |

(continued)

Appendix Table 1. (Continued)

| CHR | BP       | SNP        | A1 | A2 | A1_freq | Beta    | p        | Imputed |
|-----|----------|------------|----|----|---------|---------|----------|---------|
| 15  | 91461811 | rs6416579  | G  | A  | 0.3313  | 1.081   | 4.67E-05 | No      |
| 15  | 91788851 | rs11074186 | A  | G  | 0.1657  | -1.568  | 1.13E-05 | No      |
| 18  | 11283890 | rs987890   | A  | C  | 0.1135  | -1.617  | 4.94E-05 | No      |
| 22  | 35528968 | rs5750309  | T  | C  | 0.3187  | 1.206   | 1.34E-05 | No      |
| 22  | 35529752 | rs2022068  | A  | G  | 0.3926  | 1.1831  | 6.61E-06 | Yes     |
| 22  | 35536287 | rs4820254  | G  | T  | 0.4928  | -1.3933 | 1.23E-05 | Yes     |
| 22  | 35538606 | rs5750310  | A  | C  | 0.567   | -1.3572 | 3.96E-05 | Yes     |
| 23  | 39770574 | rs17145638 | C  | T  | 0.1169  | -2.329  | 1.79E-07 | No      |

included for SM D1MFS. During the covariate selection step, we did not consider the effect of any SNP.

The presence of *Streptococcus mutans* was either tested by means of a Dentocult<sup>®</sup>SM Strip mutans kit (Orion Diagnostica, Espoo, Finland) with saliva samples or determined genetically by a real-time PCR assay with DNA samples extracted from saliva (Vieira *et al.*, 2011). The measure of *Streptococcus mutans* was qualitative (*i.e.*, the covariate was coded as 1 if present, and 0 if not). Education group was coded in discrete numbers ranging from 1 to 3, and was treated as ordinal values in the model; “1” indicated “up to high school”, “2” indicated “some college”, “3” indicated “four-year degree or beyond”.

In addition to the strategy described above, we performed sensitivity analyses using several other covariate models, including models that used all covariates and models that used only age. None of these modeling variations produced any significant difference in the qualitative genetic results – the list of top genes was unchanged, and the *p* values differed only very slightly.

### Genotyping, Statistical Analysis, and Result Annotation

The genotype data are publicly available from dbGap (<http://www.ncbi.nlm.nih.gov/gap>, study accession designation phs000095.v1.p1). The Illumina Human610-Quadv1\_B BeadChip (Illumina, Inc., San Diego, CA, USA) and Illumina Infinium II assay protocol were used for this study. All genotyping was carried out on behalf of the NIH Gene Environment Association Studies (GENEVA) consortium by the Johns Hopkins University Center for Inherited Disease Research (CIDR). Data cleaning, quality assessment, and imputation were conducted jointly with the GENEVA consortium Coordinating Center. Among 620,901 SNPs released by CIDR, 2,671 SNPs were filtered out due to Hardy-Weinberg equilibrium *p* values under .001; 32,417 SNPs were filtered out due to missing rates higher than 10%; 69,818 SNPs were filtered out due to minor allele frequency less than 2%, yielding a total of 548,012 SNPs passing all the filters for the PF-surface analysis, and 548,051 for the SM-surface analysis.

The GENEVA Coordinating Center performed imputation with BEAGLE (Browning and Browning, 2009) using the HapMap Phase III reference panel for autosomal SNPs. Certain sample-chromosome combinations were excluded where a gross

chromosomal anomaly was detected or when the chromosome-specific missing call rate was  $\geq 5\%$ . All chromosomes for a given sample were excluded when the missing call rate across all chromosomes was  $\geq 5\%$ . Only study participants of European ancestry as defined *via* principal components analysis were selected for imputation analysis. European ancestry individuals were defined as those falling within 5 standard deviations of the mean of eigenvectors 1 and 2 for self-identified white participants. Sporadic missingness of SNPs was also imputed. To determine the imputation quality of BEAGLE, we performed masked SNP analysis (*i.e.*, comparison of imputed and experimentally determined genotypes) and analysis of Mendelian inconsistencies for imputed SNPs among relatives. The imputation quality was high. Details are available online in the “GENEVA Dental Caries project imputation report” ([http://www.genevastudy.org/docs/DentalCaries\\_imputation\\_report\\_final.pdf](http://www.genevastudy.org/docs/DentalCaries_imputation_report_final.pdf)).

Association between PF- or SM-surface caries scores and each SNP was tested with PLINK (Purcell *et al.*, 2007). To see if different statistical tests dramatically affected X chromosome SNPs rs17145638 and rs3788848 *p* values, we compared results from the PLINK test, which puts men and women on different scales (men coded as 0/1 for genotypes A/B, women coded as 0/1/2 for genotypes AA/AB/BB), linear regressions putting men and women on the same scale (men coded as 0/2 for A/B, women coded as 0/1/2 for AA/AB/BB), and meta-analysis on stratified analysis by sex (*i.e.*, applied the PLINK test to men and women separately). In any of these tests, *p* values of the 2 SNPs stayed within the suggestive range ( $<5 \times 10^{-5}$ ). We chose to report the *p* values from PLINK test. Association tests were conducted for genotyped data and imputed data separately, and the results were merged, with the genotyped results retained whenever there was an overlap.

Manhattan plots were generated by Haploview (Barrett *et al.*, 2005). Quantile-quantile plots and genomic inflation factors ( $\lambda$ ) were generated by the R statistical package (R Foundation for Statistical Computing, Vienna, Austria). We chose to maintain statistical power and included all samples while carefully monitoring type I error, which may be subject to inflation if there is a substantial number of related samples, by setting a relatively stringent suggestive significance threshold ( $\alpha = 5 \times 10^{-5}$ ). Also, no severe skewness of quantile-quantile plots was observed either

**Appendix Table 2.** 117 SNPs for SM Surface Scans Meeting Suggestive Significance (*i.e.*,  $p$  value < 5E-5)

| CHR | BP        | SNP        | A1 | A2 | A1_freq | Beta     | $p$      | Imputed |
|-----|-----------|------------|----|----|---------|----------|----------|---------|
| 1   | 9432408   | rs10779726 | C  | G  | 0.8237  | -3.6881  | 2.02E-05 | Yes     |
| 1   | 9433113   | rs11121423 | C  | T  | 0.8236  | -3.6925  | 1.98E-05 | Yes     |
| 1   | 84998887  | rs1750491  | A  | G  | 0.2815  | 3.186    | 1.85E-05 | No      |
| 1   | 104688236 | rs11811323 | G  | A  | 0.03387 | 7.438    | 3.74E-05 | No      |
| 1   | 208435759 | rs12094311 | G  | A  | 0.1508  | 3.912    | 3.41E-05 | No      |
| 1   | 208437213 | rs12060567 | A  | G  | 0.1508  | 3.912    | 3.41E-05 | No      |
| 1   | 208956814 | rs11119577 | A  | T  | 0.1501  | 4.0053   | 1.29E-05 | Yes     |
| 1   | 208960258 | rs6681860  | A  | C  | 0.8537  | -3.9032  | 3.16E-05 | Yes     |
| 1   | 208961270 | rs12022982 | A  | G  | 0.1326  | 4.193    | 1.23E-05 | No      |
| 1   | 208963316 | rs7555360  | T  | G  | 0.1337  | 4.022    | 2.57E-05 | No      |
| 1   | 208964372 | rs10863852 | A  | C  | 0.1344  | 4.2433   | 7.79E-06 | Yes     |
| 1   | 208964886 | rs1934620  | A  | G  | 0.8656  | -4.2462  | 7.70E-06 | Yes     |
| 1   | 208966802 | rs10863853 | A  | G  | 0.8646  | -4.2301  | 8.38E-06 | Yes     |
| 1   | 244336191 | rs6681900  | T  | C  | 0.08158 | 5.058    | 2.57E-05 | No      |
| 1   | 244336569 | rs6689428  | G  | A  | 0.08015 | 5.186    | 1.81E-05 | No      |
| 1   | 244348150 | rs6686745  | C  | T  | 0.9144  | -4.8267  | 4.72E-05 | Yes     |
| 1   | 244348886 | rs12404212 | C  | T  | 0.9143  | -4.8269  | 4.72E-05 | Yes     |
| 2   | 15302935  | rs9287655  | T  | C  | 0.406   | 2.852    | 2.10E-05 | No      |
| 2   | 15344624  | rs4668892  | C  | T  | 0.5568  | -2.8106  | 3.29E-05 | Yes     |
| 2   | 15345075  | rs4668893  | C  | T  | 0.4397  | 2.7452   | 4.09E-05 | Yes     |
| 2   | 48956648  | rs995146   | A  | C  | 0.9306  | -7.3272  | 1.69E-05 | Yes     |
| 2   | 85192530  | rs3893079  | C  | A  | 0.05492 | 6.312    | 1.41E-05 | No      |
| 2   | 108245143 | rs1470874  | A  | G  | 0.3625  | 2.793    | 4.25E-05 | No      |
| 2   | 185640560 | rs263767   | G  | A  | 0.2419  | -3.181   | 2.82E-05 | No      |
| 2   | 218073793 | rs4372880  | T  | C  | 0.1322  | -4.156   | 2.44E-05 | No      |
| 2   | 218079446 | rs9989823  | T  | C  | 0.136   | -4.088   | 2.86E-05 | No      |
| 2   | 218093085 | rs2373077  | A  | C  | 0.1279  | -4.129   | 3.43E-05 | No      |
| 2   | 218827379 | rs7600989  | G  | T  | 0.9612  | -8.0739  | 2.26E-06 | Yes     |
| 2   | 218834980 | rs1567869  | C  | T  | 0.0416  | 8.0814   | 1.99E-06 | Yes     |
| 2   | 218836750 | rs2292549  | C  | T  | 0.0397  | 8.0833   | 1.93E-06 | Yes     |
| 2   | 218838758 | rs1079204  | A  | G  | 0.0378  | 8.4526   | 1.90E-06 | Yes     |
| 2   | 218878706 | rs1017697  | A  | G  | 0.0404  | 7.8129   | 3.34E-06 | Yes     |
| 2   | 218879706 | rs2014597  | A  | G  | 0.0404  | 7.8309   | 3.21E-06 | Yes     |
| 2   | 218896913 | rs6708662  | C  | T  | 0.0424  | 7.6107   | 5.24E-06 | Yes     |
| 2   | 218898957 | rs10192690 | A  | G  | 0.959   | -7.9885  | 4.27E-06 | Yes     |
| 2   | 229584711 | rs16825564 | A  | G  | 0.9024  | -4.8062  | 9.08E-06 | Yes     |
| 2   | 229591741 | rs7563172  | A  | C  | 0.0967  | 4.7758   | 1.05E-05 | Yes     |
| 2   | 229593322 | rs10490035 | C  | A  | 0.09685 | 4.762    | 1.34E-05 | No      |
| 3   | 70017021  | rs17006578 | A  | G  | 0.9899  | -14.3399 | 4.62E-05 | Yes     |
| 3   | 126170457 | rs1909586  | G  | T  | 0.3824  | 2.9042   | 3.92E-05 | Yes     |
| 3   | 168209459 | rs6781033  | A  | G  | 0.785   | 3.3438   | 3.53E-05 | Yes     |
| 3   | 168252662 | rs1519943  | C  | T  | 0.7467  | 3.1428   | 3.61E-05 | Yes     |
| 3   | 176307233 | rs4894477  | A  | G  | 0.4077  | 2.809    | 1.79E-05 | No      |
| 3   | 176310488 | rs6782155  | A  | G  | 0.4084  | 2.858    | 1.29E-05 | No      |
| 4   | 15626996  | rs2286458  | G  | T  | 0.0677  | 5.9704   | 3.83E-06 | Yes     |
| 4   | 15627380  | rs2677789  | A  | C  | 0.06651 | 5.808    | 8.54E-06 | No      |
| 4   | 15627422  | rs2531154  | G  | A  | 0.06638 | 5.808    | 8.45E-06 | No      |
| 4   | 15630636  | rs1829271  | A  | G  | 0.9357  | -6.3378  | 1.78E-06 | Yes     |
| 4   | 15631638  | rs2677780  | A  | G  | 0.9356  | -6.3471  | 1.74E-06 | Yes     |
| 4   | 15645094  | rs6816182  | C  | T  | 0.1085  | 4.4903   | 4.78E-05 | Yes     |
| 4   | 40668284  | rs4466078  | A  | T  | 0.9856  | -17.8273 | 1.54E-05 | Yes     |
| 4   | 66795224  | rs4289486  | A  | G  | 0.05344 | 6.291    | 2.06E-05 | No      |
| 4   | 78101455  | rs17002297 | C  | T  | 0.7844  | -3.3733  | 3.20E-05 | Yes     |
| 4   | 78121149  | rs4241597  | A  | G  | 0.7832  | -3.3672  | 3.17E-05 | Yes     |
| 4   | 141929596 | rs11930453 | A  | C  | 0.3961  | 2.7239   | 4.77E-05 | Yes     |
| 4   | 147095001 | rs723794   | G  | T  | 0.2686  | 3.645    | 5.94E-07 | No      |
| 5   | 131900972 | rs739718   | C  | T  | 0.0754  | 5.1874   | 3.47E-05 | Yes     |
| 5   | 156123792 | rs1845479  | G  | A  | 0.03721 | 7.77     | 1.36E-05 | No      |
| 5   | 156124842 | rs11953631 | T  | C  | 0.03677 | 7.8      | 1.42E-05 | No      |

(continued)

Appendix Table 2. (Continued)

| CHR | BP        | SNP        | A1 | A2 | A1_freq | Beta     | p        | Imputed |
|-----|-----------|------------|----|----|---------|----------|----------|---------|
| 5   | 158485488 | rs1582508  | A  | G  | 0.4885  | 2.796    | 2.33E-05 | No      |
| 5   | 158500688 | rs2420355  | A  | C  | 0.4372  | -2.7032  | 4.19E-05 | Yes     |
| 5   | 170173001 | rs11134654 | A  | C  | 0.1735  | 4.6139   | 2.12E-07 | Yes     |
| 5   | 170176011 | rs1422160  | A  | G  | 0.1718  | 4.322    | 1.32E-06 | No      |
| 5   | 170195941 | rs11745293 | C  | T  | 0.8527  | -4.0611  | 1.18E-05 | Yes     |
| 5   | 170202257 | rs888811   | C  | T  | 0.1452  | 4.0888   | 1.30E-05 | Yes     |
| 6   | 31298517  | rs9263985  | A  | G  | 0.3321  | -2.86    | 4.67E-05 | No      |
| 6   | 88894335  | rs9353524  | C  | G  | 0.7982  | -3.6251  | 1.44E-05 | Yes     |
| 6   | 167085776 | rs10946186 | T  | C  | 0.4948  | -2.814   | 1.69E-05 | No      |
| 6   | 167086923 | rs9295368  | A  | G  | 0.5766  | -2.7747  | 3.20E-05 | Yes     |
| 6   | 167096924 | rs388372   | T  | C  | 0.3569  | 2.995    | 1.72E-05 | No      |
| 6   | 167097412 | rs635808   | T  | C  | 0.2266  | -3.394   | 1.44E-05 | No      |
| 8   | 26137422  | rs4275231  | T  | C  | 0.1656  | 3.791    | 1.78E-05 | No      |
| 8   | 27375822  | rs11778371 | T  | C  | 0.05153 | -6.018   | 4.57E-05 | No      |
| 8   | 67695752  | rs2467750  | A  | G  | 0.04298 | 6.955    | 2.40E-05 | No      |
| 8   | 90062604  | rs10429371 | C  | T  | 0.2142  | 3.8      | 3.00E-06 | No      |
| 8   | 90084328  | rs1487791  | A  | G  | 0.735   | -3.33    | 1.68E-05 | Yes     |
| 8   | 90087157  | rs12676566 | C  | G  | 0.735   | -3.3252  | 1.73E-05 | Yes     |
| 8   | 90280216  | rs2046315  | T  | C  | 0.1322  | 5.187    | 7.85E-08 | No      |
| 8   | 134554009 | rs7835464  | A  | G  | 0.04723 | 6.371    | 4.01E-05 | No      |
| 8   | 140045364 | rs7834262  | G  | T  | 0.2366  | 3.387    | 2.03E-05 | No      |
| 9   | 22761006  | rs10965448 | T  | G  | 0.04437 | 6.533    | 4.71E-05 | No      |
| 9   | 22783225  | rs10811775 | G  | A  | 0.05072 | 6.405    | 2.65E-05 | No      |
| 9   | 101274144 | rs649057   | T  | G  | 0.05057 | 6.806    | 7.72E-06 | No      |
| 10  | 5391308   | rs7081234  | C  | T  | 0.5211  | 2.7347   | 2.42E-05 | Yes     |
| 10  | 5394347   | rs10904478 | C  | T  | 0.4051  | -2.8759  | 1.21E-05 | Yes     |
| 10  | 5414727   | rs11253143 | A  | G  | 0.6054  | 3.036    | 1.39E-05 | Yes     |
| 10  | 10425015  | rs7087371  | C  | T  | 0.3587  | -2.9197  | 4.78E-05 | Yes     |
| 10  | 13893858  | rs7088455  | A  | G  | 0.06155 | 5.933    | 1.58E-05 | No      |
| 10  | 17294838  | rs7080366  | T  | C  | 0.437   | -2.71    | 3.76E-05 | No      |
| 10  | 21607442  | rs12358291 | T  | G  | 0.06584 | 5.565    | 2.49E-05 | No      |
| 10  | 129997306 | rs1255136  | A  | G  | 0.5118  | 2.7693   | 2.48E-05 | Yes     |
| 10  | 131569383 | rs4142058  | A  | G  | 0.3559  | -2.83    | 4.64E-05 | No      |
| 11  | 80889400  | rs11232701 | C  | G  | 0.0955  | 5.3955   | 1.03E-05 | Yes     |
| 11  | 80904206  | rs10897833 | G  | A  | 0.09351 | 4.945    | 2.65E-05 | No      |
| 11  | 80909584  | rs11232711 | G  | A  | 0.09303 | 4.851    | 3.93E-05 | No      |
| 11  | 80910473  | rs4944304  | C  | A  | 0.09447 | 5.059    | 1.58E-05 | No      |
| 11  | 80912798  | rs2032381  | G  | T  | 0.9212  | -5.6947  | 3.68E-06 | Yes     |
| 11  | 132607863 | rs7933745  | A  | G  | 0.1613  | -3.821   | 1.25E-05 | No      |
| 11  | 132626147 | rs2078454  | A  | C  | 0.2094  | -3.603   | 6.05E-06 | No      |
| 13  | 19971094  | rs7335998  | C  | G  | 0.0112  | 12.5701  | 2.95E-05 | Yes     |
| 13  | 19972980  | rs9506503  | A  | C  | 0.0133  | 12.4141  | 4.27E-05 | Yes     |
| 13  | 19973813  | rs6490590  | C  | T  | 0.9889  | -12.5924 | 2.85E-05 | Yes     |
| 13  | 20178034  | rs735539   | T  | C  | 0.2476  | 3.241    | 2.31E-05 | No      |
| 13  | 20183009  | rs6490605  | A  | G  | 0.2471  | 3.2794   | 1.71E-05 | Yes     |
| 13  | 58925818  | rs17056606 | A  | G  | 0.9893  | -13.836  | 1.56E-05 | Yes     |
| 18  | 45458441  | rs8082881  | G  | A  | 0.05391 | 6.29     | 2.02E-05 | No      |
| 18  | 61341576  | rs12962841 | A  | G  | 0.4269  | -2.8258  | 3.58E-05 | Yes     |
| 18  | 67590053  | rs17085106 | G  | T  | 0.9843  | -11.6027 | 1.34E-05 | Yes     |
| 18  | 67592624  | rs8099373  | A  | G  | 0.9846  | -12.071  | 9.54E-06 | Yes     |
| 18  | 72447295  | rs13381274 | C  | T  | 0.0665  | 5.8385   | 2.43E-05 | Yes     |
| 18  | 72447598  | rs13381277 | G  | A  | 0.06107 | 5.889    | 1.57E-05 | No      |
| 20  | 41425015  | rs2010809  | C  | T  | 0.9883  | -14.0668 | 1.83E-06 | Yes     |
| 20  | 41435864  | rs6103260  | G  | T  | 0.9883  | -14.0537 | 1.87E-06 | Yes     |
| 20  | 41444367  | rs6017025  | A  | G  | 0.9867  | -11.6564 | 3.00E-05 | Yes     |
| 20  | 41447413  | rs6103268  | C  | G  | 0.0131  | 12.5835  | 1.13E-05 | Yes     |
| 23  | 129022933 | rs6637684  | T  | C  | 0.2493  | 3.652    | 2.98E-05 | No      |
| 23  | 129027493 | rs3788848  | G  | A  | 0.2605  | 3.807    | 1.01E-05 | No      |

**Appendix Table 3.** Caries Scores of the Most Significant SNPs for X Chromosome Genes *BCOR* and *BCORL1* by Sex and Genotype

| SNP (phenotype)       | Major Allele | Minor Allele | Sex     | Genotype | Genotype Count | Phenotype Mean | 95% CI from <i>t</i> distribution |
|-----------------------|--------------|--------------|---------|----------|----------------|----------------|-----------------------------------|
| rs17145638 (PF D1MFS) | T            | C            | Females | CC       | 9              | 6              | (1.9, 10.1)                       |
|                       |              |              |         | TC       | 128            | 7.1            | (6.1, 8.2)                        |
|                       |              |              |         | TT       | 486            | 9.9            | (9.4, 10.5)                       |
|                       |              |              | Males   | C        | 42             | 6.9            | (5.3, 8.5)                        |
|                       |              |              |         | T        | 352            | 8.7            | (8.1, 9.3)                        |
|                       |              |              |         |          |                |                |                                   |
| rs3788848 (SM D1MFS)  | A            | G            | Females | GG       | 34             | 22.3           | (14.8, 29.7)                      |
|                       |              |              |         | GA       | 254            | 13.7           | (11.6, 15.8)                      |
|                       |              |              |         | AA       | 325            | 10.6           | (9.1, 12.1)                       |
|                       |              |              | Males   | G        | 98             | 15.1           | (11.3, 18.9)                      |
|                       |              |              |         | A        | 293            | 11.1           | (9.5, 12.6)                       |
|                       |              |              |         |          |                |                |                                   |

Note: not adjusted for covariates.

from genomic inflation factors  $\lambda$  or by visual inspection. In addition, we focused more on the rank of association signals than on their nominal *p* values, and the ranks were not affected by relatedness.

LocusZoom (<http://csg.sph.umich.edu/locuszoom/>) (Pruim *et al.*, 2010) was used to plot association signals for loci of interest. Following the adopted standard in the field, we chose a genome-wide significance threshold of  $\alpha = 5E-8$ , which is an extremely conservative choice based on a Bonferroni correction for one million SNPs. Following the perspective that GWAS is useful as a hypothesis-generating approach (in contrast to a strict hypothesis-testing approach), we set our suggestive significance threshold at  $\alpha = 5E-5$ , to diminish Type I error and generate a reasonable number of SNPs to be annotated. All genes within the 400-kb flanking region of suggestive SNPs were annotated. Based on gene function (such as existing biological data that supported the role of certain genes in tooth development or other caries-related processes, including previous association with dental malformation, previous expression studies in relevant tissues, and previous mouse studies) and proximity, we selected promising genes to nominate as possible susceptibility genes.

## APPENDIX REFERENCES

- Barrett JC, Fry B, Maller J, Daly MJ (2005). Haploview: analysis and visualization of LD and haplotype maps. *Bioinformatics* 21:263-265.
- Browning BL, Browning SR (2009). A unified approach to genotype imputation and haplotype-phase inference for large data sets of trios and unrelated individuals. *Am J Hum Genet* 84:210-223.
- Polk DE, Weyant RJ, Crout RJ, McNeil DW, Tarter RE, Thomas JG, *et al.* (2008). Study protocol of the Center for Oral Health Research in Appalachia (COHRA) etiology study. *BMC Oral Health* 8:18.
- Pruim RJ, Welch RP, Sanna S, Teslovich TM, Chines PS, Gliedt TP, *et al.* (2010). LocusZoom: regional visualization of genome-wide association scan results. *Bioinformatics* 26:2336-2337.
- Purcell S, Neale B, Todd-Brown K, Thomas L, Ferreira MA, Bender D, *et al.* (2007). PLINK: a tool set for whole-genome association and population-based linkage analyses. *Am J Hum Genet* 81:559-575.
- Vieira AR, Deeley KB, Callahan NF, Noel JB, Anjomshoa I, Carricato WM, *et al.* (2011). Detection of *Streptococcus mutans* genomic DNA in human DNA samples extracted from saliva and blood. *ISRN Dent* 2011:543561.
- Wang X, Shaffer JR, Weyant RJ, Cuenco KT, DeSensi RS, Crout R, *et al.* (2010). Genes and their effects on dental caries may differ between primary and permanent dentitions. *Caries Res* 44:277-284.
- Wendell S, Wang X, Brown M, Cooper ME, DeSensi RS, Weyant RJ, *et al.* (2010). Taste genes associated with dental caries. *J Dent Res* 89:1198-1202.
